# Supplementary material for: Clomiphene, Metformin, or Both for Infertility in the Polycystic Ovary Syndrome
Source: Atypon-hosted journal article supplement (doi:10.1056/nejmoa063971), 2007-02-07
Supplement: nejm_legro_551sa1.pdf [file nejm_legro_551sa1.pdf]

## Supplementary Appendix

This appendix has been provided by the authors to give readers additional information about their work.

Supplement to: Legro RS, Barnhart HX, Schlaff WD, et al. Clomiphene, metformin, or both for infertility in the polycystic ovary syndrome. *N Engl J Med* 2007;356:551-66.

**SUPPLEMENTAL TABLE 1.** Treatment Results by Treatment Group Stratified by BMI.

| BMI < 30 (N=179)                                |                           |                     | BMI 30-34 (N=135)                        |                           |                     | BMI ≥ 35 (N=311)                         |                            |                      |                                          |
|-------------------------------------------------|---------------------------|---------------------|------------------------------------------|---------------------------|---------------------|------------------------------------------|----------------------------|----------------------|------------------------------------------|
|                                                 | Clomiphene Citrate (n=57) | Metformin XR (n=57) | Combined Clomiphene and Metformin (n=65) | Clomiphene Citrate (n=42) | Metformin XR (n=45) | Combined Clomiphene And Metformin (n=48) | Clomiphene Citrate (n=110) | Metformin XR (n=105) | Combined Clomiphene And Metformin (n=96) |
| Mean (SD) BMI                                   | 25.2 (3.2)                | 25.3 (3.2)          | 24.6 (3.3)                               | 32.6 (1.4)                | 32.4 (1.3)          | 32.5 (1.6)                               | 42.8 (6.0)                 | 42.6 (5.2)           | 41.5 (5.3)                               |
| Ovulation                                       | 135/222 (60.8%)           | 100/261 (38.3%)     | 219/300 (73.0%)                          | 103/173 (59.5%)           | 99/225 (44.0%)      | 134/222 (60.4%)                          | 224/547 (41.0%)            | 97/530 (18.3%)       | 229/442 (51.8%)                          |
| Conception                                      | 24/57 (42.1%)             | 12/57 (21.1%)       | 30/65 (46.2%)                            | 12/42 (28.6%)             | 8/45 (17.8%)        | 16/48 (33.3%)                            | 26/110 (23.6%)             | 5/105 (4.8%)         | 34/96 (35.4%)                            |
| Pregnancy                                       | 21/57 (36.8%)             | 7/57 (12.3%)        | 26/65 (40.0%)                            | 8/42 (19.0%)              | 7/45 (15.6%)        | 10/48 (20.8%)                            | 21/110 (19.1%)             | 4/105 (3.8%)         | 29/96 (30.2%)                            |
| Singleton                                       | 19/21 (90.5%)             | 7/7 (100.0%)        | 25/26 (96.2%)                            | 8/8 (100.0%)              | 7/7 (100.0%)        | 9/10 (90.0%)                             | 20/21 (95.2%)              | 4/4 (100.0%)         | 29/29 (100.0%)                           |
| Twins                                           | 1/21 (4.8%)               | 0                   | 1/26 (3.8%)                              | 0                         | 0                   | 1/10 (10.0%)                             | 1/21 (4.8%)                | 0                    | 0                                        |
| Triplets                                        | 1/21 (4.8%)               | 0                   | 0                                        | 0                         | 0                   | 0                                        | 0                          | 0                    | 0                                        |
| Other                                           | 0                         | 0                   | 0                                        | 0                         | 0                   | 0                                        | 0                          | 0                    | 0                                        |
| Live Birth                                      | 21/57 (36.8%)             | 5/57 (8.8%)         | 24/65 (36.9%)                            | 8/42 (19.0%)              | 6/45 (13.3%)        | 10/48 (20.8%)                            | 18/110 (16.4%)             | 4/105 (3.8%)         | 22/96 (22.9%)                            |
| All pregnancy loss among patients who conceived | 4/24 (16.7%)              | 7/12 (58.3%)        | 6/30 (20.0%)                             | 4/12 (33.3%)              | 2/8 (25.0%)         | 6/16 (37.5%)                             | 8/26 (30.1%)               | 1/5 (20.0%)          | 12/34 (35.3%)                            |
| 1 <sup>st</sup> trimester loss                  | 3/24 (12.5%)              | 7/12 (58.3%)        | 4/30 (13.3%)                             | 4/12 (33.3%)              | 2/8 (25.0%)         | 6/16 (37.5%)                             | 7/26 (26.9%)               | 1/5 (20.0%)          | 10/34 (29.4%)                            |
| Biochemical or no fetal heart beat              | 1/24 (4.2%)               | 5/12 (41.7%)        | 4/30 (13.3%)                             | 4/12 (33.3%)              | 1/8 (12.5%)         | 5/16 (31.3%)                             | 5/26 (19.2%)               | 1/5 (20.0%)          | 4/34 (11.8%)                             |
| Ectopic                                         | 2/24 (8.3%)               | 0/12 (0.0%)         | 0/30 (0.0%)                              | 0/12 (0.0%)               | 0/8 (0.0%)          | 1/16 (6.3%)                              | 0/26 (0.0%)                | 0/5 (0.0%)           | 1/34 (2.9%)                              |
| Loss after observed heart beat                  | 0/24 (0.0%)               | 2/12 (16.7%)        | 0/30 (0.0%)                              | 0/12 (0.0%)               | 1/8 (12.5%)         | 0/16 (0.0%)                              | 2/26 (7.7%)                | 0/5 (0.0%)           | 5/34 (14.7%)                             |
| 2 <sup>nd</sup> -3 <sup>rd</sup> trimester loss | 1/24 (4.2%)               | 0/12 (0.0%)         | 2/30 (6.7%)                              | 0/12 (0.0%)               | 0/8 (0.0%)          | 0/16 (0.0%)                              | 1/26 (3.8%)                | 0/5 (0.0%)           | 2/34 (5.9%)                              |

Ovulation was defined by a serum progesterone level > 5 ng/mL; Conception was defined as any positive serum hCG level; Pregnancy defined as an intrauterine pregnancy with fetal heart motion as determined by transvaginal ultrasound; and Live Birth defined as delivery of any viable infant.

**SUPPLEMENTAL TABLE 2.** Results by Treatment Group Stratified by Previous Therapy.

|                                                 | Previous Therapy (N=343)   |                      |                                           | No Previous Therapy (N=283) |                     |                                          |
|-------------------------------------------------|----------------------------|----------------------|-------------------------------------------|-----------------------------|---------------------|------------------------------------------|
|                                                 | Clomiphene Citrate (n=116) | Metformin XR (n=111) | Combined Clomiphene and Metformin (n=116) | Clomiphene Citrate (n=93)   | Metformin XR (n=97) | Combined Clomiphene and Metformin (n=93) |
| Ovulation                                       | 272/538 (50.6%)            | 151/554 (27.3%)      | 334/559 (59.7%)                           | 190/404 (47.0%)             | 145/465 (31.2%)     | 248/405 (61.2%)                          |
| Conception                                      | 32/116 (27.6%)             | 13/111 (11.7%)       | 39/116 (33.6%)                            | 30/93 (32.3%)               | 12/97 (12.4%)       | 41/93 (44.1%)                            |
| Pregnancy                                       | 24/116 (20.7%)             | 8/111 (7.2%)         | 31/116 (26.7%)                            | 26/93 (28.0%)               | 10/97 (10.3%)       | 34/93 (36.6%)                            |
| Singleton                                       | 24/24 (100.0%)             | 8/8 (100.0%)         | 30/31 (96.8%)                             | 23/26 (88.5%)               | 10/10 (100.0%)      | 33/34 (97.1%)                            |
| Twins                                           | 0                          | 0                    | 1/31 (3.2%)                               | 2/26 (7.7%)                 | 0                   | 1/34 (2.9%)                              |
| Triplets                                        | 0                          | 0                    | 0                                         | 1/26 (3.8%)                 | 0                   | 0                                        |
| Other                                           | 0                          | 0                    | 0                                         | 0                           | 0                   | 0                                        |
| Live Births                                     | 23/116 (19.8%)             | 6/111 (5.4%)         | 26/116 (22.4%)                            | 24/93 (25.8%)               | 9/97 (9.3%)         | 30/93 (32.3%)                            |
| All pregnancy loss among patients who conceived | 9/32 (28.1%)               | 7/13 (53.9%)         | 13/39 (33.3%)                             | 7/30 (23.3%)                | 3/12 (25.0%)        | 11/41 (26.8%)                            |
| 1 <sup>st</sup> trimester loss                  | 9/32 (28.1%)               | 7/13 (53.9%)         | 11/39 (28.2%)                             | 5/30 (16.7%)                | 3/12 (25.0%)        | 9/41 (22.0%)                             |
| Biochemical or no fetal heart beat              | 6/31 (18.8%)               | 5/13 (38.5%)         | 8/39 (20.5%)                              | 4/30 (13.3%)                | 2/12 (16.7%)        | 5/41 (12.2%)                             |
| Ectopic                                         | 2/31 (6.3%)                | 0/13 (0.0%)          | 0/39 (0.0%)                               | 0/30 (0.0%)                 | 0/12 (0.0%)         | 2/41 (4.9%)                              |
| Loss after observed heart beat                  | 1/31 (3.1%)                | 2/13 (15.4%)         | 3/39 (7.7%)                               | 1/30 (3.3%)                 | 1/12 (8.3%)         | 2/41 (4.9%)                              |
| 2 <sup>nd</sup> -3 <sup>rd</sup> trimester loss | 0/32 (0.0%)                | 0/13 (0.0%)          | 2/39 (5.1%)                               | 2/30 (6.7%)                 | 0/12 (0.0%)         | 2/41 (4.9%)                              |

Ovulation was defined by a serum progesterone level > 5 ng/mL; Conception was defined as any positive serum hCG level; Pregnancy

defined as an intrauterine pregnancy with fetal heart motion as determined by transvaginal ultrasound; and Live Birth defined as delivery of any viable infant.
